1 **Abstract**

2 **Background:** Sodium toxicity and potassium insufficient are important factors  
3 affecting the growth and development of maize in saline soil. The monovalent cation  
4 proton antiporter (CPA) superfamily comprises Na<sup>+</sup>/H<sup>+</sup> exchanger (NHX), K<sup>+</sup> efflux  
5 antiporter (KEA), and cation/H<sup>+</sup> exchanger (CHX) subfamily proteins, which play  
6 vital functions in maize salt tolerance.

7 **Results:** A total of 35 *ZmCPA* genes were identified in maize, and they were  
8 phylogenetically classified into 13 *ZmNHXs*, 16 *ZmCHXs* and 6 *ZmKEAs*. *ZmCPA*  
9 genes have a conserved gene structure, with the determined introns range from 11 to  
10 25, 0 to 5 and 16 to 19 in *ZmNHXs*, *ZmCHXs*, *ZmKEAs*, respectively. All proteins  
11 have transmembrane domains, with an average transmembrane number of 8, 10, and  
12 10 in *ZmNHX*, *ZmCHX* and *ZmKEA* proteins, respectively. Transient expression in  
13 maize protoplasts showed that *ZmCHX16* and *ZmNHX8* are located in the cell  
14 membrane. All *ZmCHX* subfamily genes showed lower expression compared to  
15 *ZmNHX* and *ZmKEA* subfamilies. Diverse expression in the 60 tissues and modulated  
16 expression in response to salt stress suggested *ZmCPAs'* role in maize development  
17 and salt stress. Yeast complementary experiment revealed the function of *ZmNHX8*,  
18 *ZmCHX8*, *-12*, *-14*, *-16* and *ZmKEA6* in salt tolerance. Maize mutants *zmnhx8* and  
19 *zmkea6* further validated the important function of *ZmNHX8* and *ZmKEA6* in salt  
20 tolerance. Phosphorylation sites and *cis*-acting regulation elements analyses indicated  
21 that phosphorylation and transcriptional regulation may be involved in salt tolerance  
22 of *ZmCPA* genes.

23 **Conclusions:** Our study provides comprehensive information about *ZmCPA* gene  
24 superfamily, which would be useful in their future functional characterization.

25

26 **Keywords:** CPA, maize, Salinity, *ZmNHX*, *ZmCHX*, *ZmKEA*

27

28

29

## 1 **Background**

2 High salinity stress is a major abiotic stress affecting crop production worldwide.  
3 High concentration of salt can reduce the osmotic potential of soil solution and affect  
4 the absorption of water by plant roots, resulting in slow growth of new roots and  
5 shoots. Meanwhile,  $\text{Na}^+$  and  $\text{Cl}^-$  are absorbed and accumulated to toxic concentrations  
6 in plants, which causes the generation of reactive oxygen species (ROS) leading to  
7 oxidative stress [1, 2] and senescence of older leaves [3, 4]. To date, many ion  
8 channels and transporters have been shown to play crucial roles in maintaining the ion  
9 and pH homeostasis in plants under high salinity [5-9]. Among them, the cation  
10 transporters have been well characterized and most  $\text{Na}^+$  and  $\text{K}^+/\text{H}^+$  exchangers belong  
11 to the monovalent cation/proton antiporter (CPA) superfamily, which is classified into  
12 the CPA1 and CPA2 families, according to Transporter Classification database  
13 (<http://www.tcdb.org/>) [10, 11]. The CPA1 consists of  $\text{Na}^+/\text{H}^+$  exchanger (NHX),  
14 while CPA2 consists of  $\text{K}^+$  efflux antiporter (KEA) and cation/ $\text{H}^+$  exchanger (CHX)  
15 subfamilies [12, 13].

16 The CPA1 family is divided into two main groups, including the intracellular  
17 proteins and the plasma membrane-bound proteins, according to the subcellular  
18 localization [10]. In *Arabidopsis*, six intracellular NHX isoforms *AtNHX1-6* were  
19 identified [14], which localized into the plant vacuole and endosomes, while other two  
20 deviating members (*AtSOS1/AtNHX7* and *AtNHX8*) are localized into the plasma  
21 membrane (PM) [15]. The NHXs consist of 9-12 transmembrane domains (TMs) [16]  
22 and are reported to be involved in numerous functions including salt tolerance, pH  
23 regulation, ion homeostasis, turgor generation, vesicular trafficking, protein  
24 processing and flower development. For instance, ectopic expression of *AtNHX1*  
25 causes dramatic salt tolerance in *Arabidopsis* [17,18]. Further, *AtNHX1* and *AtNHX2*  
26 are associated with  $\text{K}^+$  homeostasis, vacuolar pH control, floral development,  
27 reproduction, cell turgor, and regulation of stomata [19]. Endosomal *AtNHX5* and  
28 *AtNHX6* play key roles in cell proliferation and growth in *Arabidopsis* [20]. Under  
29 salt stress, the expression of *AtSOS1* was induced and increase the stability of its

1 transcripts [21]. The expression of *SOS1* is also induced in leaves and roots of durum  
2 wheat after H<sub>2</sub>O<sub>2</sub> treatment [22]. Ectopic expression of *GmsSOS1* could alleviate salt  
3 tolerance in *Arabidopsis* mutant *atsos1-1* [23]. However, *AtNHX8* is Li<sup>+</sup> specific and  
4 performs Li<sup>+</sup> detoxification in *Arabidopsis* [24].

5 The CPA2 type transporters are predicted to have 8-14 transmembrane domains  
6 with a Pfam00999 domain for Na<sup>+</sup>, K<sup>+</sup>/H<sup>+</sup> exchanger [12]. In *Arabidopsis*, there are 6  
7 members of the KEA subfamily and 28 members of the CHX subfamily [25]. *AtKEAs*  
8 are closely related to the bacterial K<sup>+</sup> efflux transporter genes *EcKefB* and *EcKefC*,  
9 which are involved in the tolerance to toxic metabolites [26]. The *AtKEA* subfamily  
10 contains six genes forming two subgroups in the cladogram: *AtKEA1-3* and *AtKEA4-6*.  
11 The cellular localization of *AtKEAs* seemed to be diverse in yeast cells, suggesting  
12 each member probably has a different function in K<sup>+</sup> homeostasis and osmotic  
13 adjustment [27]. *AtKEA1* and *AtKEA2* are localized in the inner envelop membrane of  
14 chloroplasts and *AtKEA3* in the thylakoid membrane. Their functions are chloroplast  
15 osmoregulation, and ion and pH homeostasis [28, 29]. *AtCHXs* regulate K<sup>+</sup> and pH  
16 homeostasis, and function in controlling membrane trafficking, osmoregulation, and  
17 pollen growth and development [30, 31]. In the *AtCHX* subfamily with 9-12 TMs, the  
18 expression of 18 *AtCHX* genes is either pollen specific or pollen enhanced, and only 6  
19 are highly expressed in vegetative tissues. This indicates that the multiple *CHX* gene  
20 plays an important role in the development, survival, and function of the male  
21 gametophyte [32]. *AtCHX14* is located in the PM and regulates K<sup>+</sup> redistribution in  
22 *Arabidopsis* [33]. *AtCHX21*, *AtCHX23* and *AtCHX24* have role in salt tolerance [34],  
23 chloroplast development and pH homeostasis [35], and leaf senescence, respectively  
24 [36]. Moreover, *AtCHX21* and *AtCHX23* are also engaged in guidance of pollen tube  
25 to the target ovules [31]. *OsCHX14* played an important role in K<sup>+</sup> homeostasis during  
26 flowering in rice [37]. *PbrCHX16* of pear also plays significant role in pollen tube  
27 growth [38].

28 In this study, genome-wide identification of *ZmCPA* genes was firstly conducted in  
29 maize. The identified proteins were classified into *ZmNHX*, *ZmKEA* and *ZmCHX*

1 subfamilies, and used for the analysis of various physicochemical properties like  
2 molecular weight (MW), isoelectric point (pI), sub-cellular localization,  
3 transmembrane (TM), motifs, structure and evolutionary relationship. The  
4 protein-encoding genes were analyzed for the occurrence of splice variants,  
5 exon-intron structure and intron phase. Phosphorylation sites and cis-acting regulatory  
6 elements were analyzed to investigate the relationship between phosphorylation and  
7 transcriptional regulation and the salt tolerance of the *ZmCPA* genes. The *ZmCPA*  
8 genes were also analyzed for their expression during numerous developmental stages  
9 and in the presence of salinity stresses. Further, six *ZmCPA* genes were cloned and  
10 used for functional characterization in the presence of salt. Two maize mutants  
11 *zmnhx8* and *zmkea6* were obtained, which further verified the important functions of  
12 *ZmNHX8* and *ZmKEA6* in salt tolerance.

13

## 14 **Results**

### 15 **Genome-wide identification and characterization of the CPA superfamily genes** 16 **in maize**

17 An extensive BLAST search identified a total of 35 *ZmCPA* superfamily proteins in  
18 the genome of maize (Table S1), which were further confirmed through Pfam  
19 database (<http://pfam.xfam.org/search>) search for the existence of signature Na<sup>+</sup>/H<sup>+</sup>  
20 exchanger (PF00999) domain. These genes were classified into three subfamilies  
21 including 13 *ZmNHX*, 16 *ZmCHX* and 6 *ZmKEA* genes based on protein similarity  
22 with the earlier reported the *CPA* genes in *Arabidopsis*. The identified *CPA* genes were  
23 named *ZmNHX1-ZmNHX13*, *ZmCHX1-ZmCHX16* and *ZmKEA1-ZmKEA6* based on  
24 their order on maize chromosomes (Table S1). The *ZmCPAs* were distributed on all  
25 chromosomes of maize, with 5, 3, 3, 4, 1, 3, 5, 4, 3 and 4 *ZmCPA* genes on  
26 chromosome 1, 2, 3, 4, 5, 6, 7, 8, 9 and 10, respectively (Figure S1). Each *ZmCPA*  
27 gene model was validated by analyzing the similarity between the *ZmCPA* genes and  
28 their orthologs of relative species, such as *Arabidopsis*, rice, *Sorghum*, *Brachypodium*  
29 *distachyon* and *Setaria italica* and by analyzing cDNA and DNA sequences of each

1 *ZmCPA* gene which were obtained using reverse transcription polymerase chain  
2 reaction (RT-PCR) assays with the gene-specific primers listed in [Table S2](#), as most of  
3 the *ZmCPA* genes had more than one transcript annotated in MaizeGDB database  
4 ([Table S1](#) and [Figure S2](#)). By cDNA and DNA sequence alignment analysis, we found  
5 that 5 *ZmCPA* genes had alternative splicing events, resulting in multiple transcripts  
6 for one gene ([Figure S3](#)), and the transcripts with the conserved gene structure similar  
7 to that of their orthologs were selected for further analysis. The gene structures of the  
8 *ZmCPA* genes were constructed by aligning their genomic sequences with cDNA  
9 sequences obtained by RT-PCR ([Figure 1](#)). The number of introns determined in  
10 *ZmNHXs*, *ZmCHXs*, *ZmKEAs* ranges from 11 to 25, 0 to 5 and 16 to 19, respectively.  
11 ([Table 1](#)). The majority of introns in each family were in 0 phase. The *ZmCPA* genes  
12 from the same subfamily share the conserved gene structure ([Figure 1](#)).

13 The average protein length of *ZmNHX*, *ZmCHX* and *ZmKEA* proteins were 640,  
14 824 and 815 amino acid (aa) residues, respectively. The average molecular weight  
15 (MW) of *ZmNHX*, *ZmCHX* and *ZmKEA* proteins were 70.8, 88.4 and 87.4 kDa,  
16 respectively. The isoelectric point (pI) value of *ZmNHX*, *ZmCHX* and *ZmKEA*  
17 proteins ranged from 5.28 to 9.07, 5.95 to 9.88, and 5.22 to 6.01, respectively ([Table](#)  
18 [1](#)).

19

## 20 **Phylogenetic analysis of maize *CPA* genes**

21 In order to analyze the evolutionary relationships among the identified *ZmCPA* genes,  
22 we aligned their protein sequences with 26 *OsCPA* and 42 *AtCPA* proteins to  
23 constructed the neighbor-joining (NJ) phylogenetic tree. The detailed information of  
24 *AtCPA* and *OsCPA* genes was shown in the [Table S3](#). Based on the topology of the  
25 phylogenetic tree, the *CPA* gene superfamily in plants can be subdivided into 3  
26 subfamilies, *NHX*, *CHX* and *KEA* subfamilies. *NHX* and *CHX* subfamilies can be  
27 further divided into groups N1, N2 and N3, and C1, C2, C3 and C4, respectively.  
28 *KEA* subfamily was formed by K1 and K2 groups. ([Figure 2](#)). In addition, we  
29 performed a phylogenetic analysis only with *ZmCPA* proteins. As described in [Fig. 3](#),

1 *ZmCPA* genes were also divided into three subfamilies of *ZmNHX*, *ZmCHX*, and  
2 *ZmKEA* genes, which is consistent with the classification in Fig. 1. (Figure 3). All  
3 groups contain the genes from the three species of *Arabidopsis*, rice, and maize,  
4 indicating that the homologous genes in each group have similar conservative  
5 functions.

6

### 7 **Subcellular localization and motif analysis of *ZmCPA* genes**

8 The transmembrane (TM) helices within *ZmCPA* proteins were predicted in TMHMM  
9 Server v. 2.0 (<http://www.cbs.dtu.dk/services/TMHMM/>). The results showed that all  
10 of *ZmCPA* proteins have transmembrane domains, and different subfamilies have  
11 different transmembrane domains (Figure S4). A maximum of 12 TM regions were  
12 predicted in *ZmNHX*2,-8, *ZmCHX*3,-11,-16 and *ZmKEA*4. The average occurrence  
13 of TM regions was 8, 10 and 10 in *ZmNHX*, *ZmCHX* and *ZmKEA* proteins,  
14 respectively (Table S1). In the *NHX* and *CHX* subfamilies, the transmembrane  
15 domain is mainly located at the C-terminal, while the transmembrane domain of  
16 *ZmKEAs* is mainly located at the N-terminal. But *ZmKEA*1, -4, -5 have a single  
17 transmembrane domain at the C-terminal. Proteins with different transmembrane  
18 domains may have different functions.

19 We performed the transient expression assay to investigate subcellular localization  
20 of *ZmCHX*16 and *ZmNHX*8 proteins with in maize protoplasts. The *ZmNHX*8-GFP  
21 and *ZmCHX*16-GFP fusion proteins were co-localized with *OsSCMP1*-RFP protein  
22 which was rice SECRETORY CARRIER MEMBRANE PROTEIN 1 fused with RFP  
23 as a membrane protein control in this study [39], suggesting that *ZmNHX*8 and  
24 *ZmCHX*16 were localized to plasma membrane (Figure 4). The tertiary structures of  
25 nine *ZmCPA* proteins were analyzed by the SWISS-MODEL server [40] and the  
26 results showed that similar 3D structures existed among the same subfamily (Figure  
27 S5).

28 Known conserved domains of *ZmCAP* proteins were identified by screening Pfam  
29 database (<http://pfam.xfam.org/>). All proteins contained the  $\text{Na}^+/\text{H}^+$  exchanger domain

1 (PF00999), and 3 ZmKEAs and 5 ZmNHXs also contained Trka\_N domain and  
2 TatD-related DNase domain, respectively (Figure S6). Meanwhile, putative motifs of  
3 the ZmCPA proteins were mined with the MEME server  
4 (<http://meme-suite.org/tools/meme>). All of 15 motif sequences identified here were  
5 listed in Table S4. Generally, ZmNHX proteins contained 5-8 conserved motifs, and  
6 motifs 3,7,9,15 was found in most of them. The ZmCHX and ZmKEA proteins had  
7 6-7 and 2-3 conserved motifs, respectively. Motifs 1 and 11 were present most  
8 frequently in ZmCHX and ZmKEA proteins (Figure S6). The conserved domains of  
9 the ZmCPA proteins corresponded to partial motifs and covers the transmembrane  
10 domain (Figure S4, Figure S6). The results revealed that most closely related  
11 members in the same subfamily have common motifs, which indicates functional  
12 similarity among the ZmCPA proteins.

13 Phosphorylation modification of ZmCPA proteins was analyzed with GPS 5.0  
14 (<http://gps.biocuckoo.cn/online.php>). Most phosphorylated sites residues of all  
15 ZmCPA proteins are evenly distributed throughout the protein (Figure S7). On  
16 average, 20.5, 23 and 18.6 phosphorylated sites were found in each member of the  
17 three subfamilies, respectively.

18

### 19 ***Cis*-elements in promoter sequences of *ZmCPA* genes**

20 The *cis*-acting regulatory elements interacted with specific transcriptional factors  
21 (TFs) are essential for gene expression regulation [41]. The *cis*-acting regulatory  
22 elements in promoter sequences of the *ZmCPA* genes were predicted in PlantCARE  
23 database (<http://bioinformatics.psb.ugent.be/webtools/plantcare/html/>) (Figure S8).  
24 On basis of functions annotations, the identified *cis*-acting elements were divided into  
25 light, stress, and hormone responsive responsive categories. In light responsive  
26 category, the G-box, Sp1, ARE, GT1-motif, the MRE, ATCT-motif and the  
27 GATA-motif were the common elements in all *ZmCPA* genes. The LTR, ARE,  
28 GC-motif, MBS and TC-rich repeats were common elements in the stress response  
29 category. The hormone responsive category contained CGTCA-motif, ABRE,



1 AuxRR-core, TGA-element, P-box, GARE-motif, TATC-box, TCA-element and  
2 MBSI.

3

#### 4 **Expression analysis in different tissues and developmental stages**

5 The NimbleGen maize microarray data [42] (ZM37) including 60 tissues representing  
6 11 major organ systems and various developmental stages of the B73 maize inbred  
7 line was employed to analyze the expression pattern of the *ZmCPA* genes. The gene  
8 expression data of 31 *ZmCPA* genes including 10 *ZmNHXs*, 16 *ZmCHXs* and 5  
9 *ZmKEAs* was used for cluster analysis. As revealed by the heatmap, all *ZmNHX* genes  
10 except *ZmNHX6* and *ZmNHX13* were highly expressed in all 60 tissues (Figure 5).  
11 *ZmNHX6* had a much higher expression level in anthers and leaf than other 58 tissues,  
12 and *ZmNHX13* was low in all 60 tissues. In case of *ZmKEAs*, all genes were highly  
13 expressed in all 60 tissues. All *ZmCHX* genes showed low expression compared to  
14 *ZmNHX* and *ZmKEA* subfamilies, and *ZmCHX* genes only exhibited high expression  
15 in anthers (Figure 5).

16 To confirm the organ-specific expression of *ZmCPA* genes revealed by the  
17 microarray data, semi-quantitative reverse transcription polymerase chain reaction  
18 (semi-q-RT-PCR) of 9 *ZmCPA* genes was performed with total RNA isolated from the  
19 roots, leaves, ears, immature tassel, pollens, anthers, silk and whole seed (20 days  
20 after pollinated) of the B73 inbred line, and the primers for semi-q-RT-PCR were listed  
21 in Table S5. The semi-q-RT-PCR analysis showed that the expression of 8 *ZmCPA*  
22 genes was consistent with that of microarray (Figure 6). The *ZmNHX4*, -5 and -8  
23 showed specific expression in roots and leaves, while *ZmCHX6*, -14, -16 were  
24 specifically expressed in pollens and anthers. *ZmKEA1* and *ZmKEA4* were  
25 predominately expressed in all tested tissues except seed (20 days after pollinated).  
26 The *ZmKEA6* was not included in the microarray data, and it had the same expression  
27 pattern as other *ZmKEA* subfamily genes.

28

#### 29 **Expression analysis of *ZmCPA* genes under salinity stress**

1 In order to understand the expression response of *ZmCPA* genes to salt stress, two  
2 gene subfamilies including 4 *ZmNHXs* and 4 *ZmKEAs* were chosen for expression  
3 profile analysis by real-time quantitative reverse transcription polymerase chain  
4 reaction (qRT-PCR) with the primers listed in [Table S6](#) ([Figure 7](#)). This study  
5 analyzed the gene expression response at 1h, 2h, 4h, and 24h after salt stress. Under  
6 100 mM KCl stress condition and in root, *ZmKEA4*, -5, -6 and *ZmNHX4*, -5, -11 were  
7 downregulated, while other genes were upregulated at first then downregulated. In  
8 leaf, all 8 *ZmCPAs* were upregulated. When treated with 100mM NaCl, expression of  
9 *ZmKEA1*, -5 and *ZmNHX4*, -5, -11 were downregulated, and *ZmNHX8* were  
10 upregulated after 24h, while that of the other genes did not change much in root. In  
11 leaf, *ZmKEA4*, -6 and *ZmNHX4*, -8, -11 were upregulated, while other genes were  
12 downregulated. In conclusion, these results implied that *ZmCPAs* might play a role in  
13 salinity stress tolerance through expression regulation.

14

#### 15 **Functional analysis of *ZmCPA* genes in yeast under salt stress**

16 To test the function of *ZmCPAs* in salt tolerance, the coding sequences of *ZmNHX8*,  
17 *ZmCHX8*, -12, -14, -16 and *ZmKEA6* were cloned into the yeast expression vector  
18 pDR196 with the promoter PMA1 and then vectors were introduced into a  
19 *Saccharomyces cerevisiae* mutant strain AXT3K. The strain AXT3K lacks the  
20 function of plasma membrane Na<sup>+</sup>-ATPases (ScENA1-4), plasma membrane Na<sup>+</sup>,  
21 K<sup>+</sup>/H<sup>+</sup> antiporter ScNHA1, and vacuolar Na<sup>+</sup>, K<sup>+</sup>/H<sup>+</sup> antiporter ScNHX1 [43].  
22 Therefore, it is sensitive to high Na<sup>+</sup>. The transformed yeast was grown on Arg  
23 phosphate (AP) medium with different levels of NaCl ([Figure 8](#)). AXT3K mutants  
24 failed to grow in medium containing 20 mM NaCl. Expression of *ZmNHX8*, *ZmCHX8*,  
25 -12, -14, -16 and *ZmKEA6* enhanced AXT3K salt tolerance ([Figure 8](#)). These results  
26 indicate that *ZmCPAs* have the function of salt tolerance.

27

#### 28 **Functional analysis of *ZmNHX8* and *ZmKEA6* under salt stress**

29 We obtained two maize mutants of *zmnhx8* (EMS4-0a18d8) and *zmkea6*

1 (EMS4-02c2af) , which were produced by EMS mutagenesis of B73 inbred line, from  
2 Maize EMS induced Mutant Database (MEMD) [44]. The *zmnhx8* and *zmkea6*  
3 mutants had pre-termination mutation in *ZmNHX8* (*Zm00001d022504*) and *ZmKEA6*  
4 gene (*Zm00001d026645*), causing production of truncated proteins (Figure 9).  
5 Phenotype of inbred lines B73 and two maize mutants were analyzed after four days  
6 of growth under salt stress. Under normal conditions, the growth status of B73 and  
7 mutants was not significantly different. However, the seedling length and dry weight  
8 of *zmnhx8* mutant under 100 mM KCl condition were significantly lower than B73  
9 without salt treatment ( $P<0.05$ ). Similarly, the seedling length and dry weight of  
10 *zmkea6* mutant under 100 mM NaCl treatment were significantly lower than B73  
11 without salt treatment ( $P<0.05$ ) (Figure 9). These results further verified that  
12 *ZmNHX8* and *ZmKEA6* are important salt tolerance-related genes.

13

#### 14 **Discussion**

15 Ion homeostasis is an essential process for the survival of plants [34] A number of  
16 cation transporters have been known to play pivotal functions in plant growth,  
17 development, nutrition, and signal transduction [25]. Cation/proton antiporters (CPAs)  
18 superfamily comprises an important group of proteins, which are responsible for the  
19 exchange of monovalent cations in bacteria, fungi, animals and plants [45]. Up to now,  
20 the function of a number of the *CPA* genes have been studied in *Arabidopsis* [14, 17,  
21 18, 20], rice [37], wheat [41], Soybean [23], and *Arachis hypogea* [46]. Most of them  
22 shown to play crucial roles in maintaining the ion and pH homeostasis in plants under  
23 high salinity [47].

24 In this study, 35 *ZmCPAs* were identified to analyze the function of this gene family  
25 in maize. Earlier six NHX genes of maize have been reported in various studies [48,  
26 49], which were probably named on the basis of their sequence similarity to known  
27 plant *CPA* genes. To avoid the ambiguity, we performed nomenclature of each  
28 *ZmCPA* gene following their order on the chromosomes. Analysis of chromosomal  
29 distribution revealed that *ZmCPAs* were evenly distributed on the 10 chromosomes of

1 maize. Similarly, the *CPA* genes were derived from all chromosomes in wheat [41],  
2 and 15 out of 17 chromosomes in pear [38], respectively. Phylogenetic tree was  
3 generated using full-length CPA protein sequences of maize, rice and *Arabidopsis*.  
4 The homologous proteins were found tightly clustered due to high homology among  
5 them. Classification of the CPA superfamily genes into NHX, KEA and CHX  
6 subfamilies and their further categorization into various groups such as N1-N3,  
7 K1-K2 and C1-C4 has also been previously performed in *Arabidopsis*, pear [13, 38].

8 The sub-cellular localization predicted of different species was consistent up to  
9 some extent. AtNHXs exhibited vacuole, endosome and plasma membrane  
10 localization [12]. Majority of ZmNHX proteins were also predicted for similar  
11 localization. ZmKEA2 was predicted chloroplast localization, which similar with  
12 AtKEA1, AtKEA2 and AtKEA3. Most of the ZmCHX proteins were predicted to be  
13 localized in plasma membrane, which same as reported for AtCHX13 and AtCHX14  
14 [33, 50]. Since, various tools predicted different localizations of different ZmCPA  
15 proteins, we chose *ZmNHX8* and *ZmCHX16* for transient expression in maize  
16 protoplast cells, and the results proved that they were expressed on the plasma  
17 membrane.

18 The expression pattern of the *ZmCPA* genes from the NimbleGen maize microarray  
19 data showed *ZmNHX6* was highly expressed in leaf and anthers, *ZmNHX9* was found  
20 to be grain specific, other *ZmNHX* and *ZmKEA* genes exhibited significant expression  
21 during multiple developmental stages. However, *ZmCHXs* were specific expression in  
22 anthers. Similar expression trend has been reported for the *CPA* genes in other plant  
23 species. *AtNHX1* and *AtNHX2* are required for growth and floral development in  
24 *Arabidopsis* [19], *AtNHX5-6* are essential for normal growth and development in  
25 *Arabidopsis* [20]. *TaNHX2*, *TaNHX5* and *TaNHX8* genes exhibited significant  
26 expression during multiple developmental stages, which suggested their crucial role in  
27 growth and development. *TaKEA6* and *TaKEA3* group genes were prominently  
28 expressed in certain developmental stages of root, leaf, stem and spike, which  
29 suggested their function in tissue development [41]. *TaCHX* family genes showed

1 distinct expression pattern where most of the genes were relatively highly expressed  
2 in anthers [41], which similar to maize suggested their role in reproductive organ  
3 development. At the same time, specific expression of genes was verified by semi-  
4 qRT-PCR. We studied expressions of the *ZmCPA* genes in the control and salinity  
5 treatments using qRT-PCR. Four *ZmKEAs* in high concentration of KCl were  
6 upregulated with salinity treatment in leaf, but in root, *ZmKEA4*, -5, -6 were  
7 downregulated in high K<sup>+</sup>. In *Arabidopsis*, *AtKEA1*, *AtKEA3* and *AtKEA4* expression  
8 was enhanced significantly under low K<sup>+</sup> stress (1mM KCl), but *AtKEA2*, -5, and -6  
9 were not [27]. The differential expression in response to K<sup>+</sup> stress suggests that  
10 *ZmKEA1* involved in K<sup>+</sup> acquisition under K<sup>+</sup> conditions in maize, whereas *ZmKEA4*,  
11 5 and 6 may have different functions. *ZmNHX8* was upregulated in NaCl treatment,  
12 but *ZmNHX4*, -5, and -11 were downregulated in root. *NHX7/SOS1* is critical for  
13 excluding Na<sup>+</sup> from plant roots [51] and *ZmNHX2* is associated with a major  
14 quantitative trait locus (QTL), *qST1*, which confers salt tolerance on maize plants [52,  
15 53]. Upregulated expressions of *ZmNHX8* in our salinity treatment support the idea  
16 that their roles in response to salt stress may be conserved in maize.

17 Six *ZmCPAs* were cloned in the yeast expression vector pDR196 and introduced  
18 into a yeast mutant strain AXT3K. They restored AXT3K mutant resistance to Na<sup>+</sup>.  
19 *ZmNHX8* had been verified again for its role in salt stress. *AtNHX5* and *AtNHX6*  
20 recovered tolerance to salt using a yeast expression system [20]. These results suggest  
21 that *ZmNHXs* share a common mode of action and are involved Na<sup>+</sup> transport in  
22 maize. Nevertheless, neither *AtCHXs* nor *AtKEAs* have been found to improve yeast  
23 growth in salt stress [12, 27]. In this study, *ZmCHX8*, -12, -14, -16 and *ZmKEA6*  
24 recovered tolerance to high Na<sup>+</sup>. This found was different from *Arabidopsis*,  
25 suggesting that the CHX and KEA subfamilies are also resistant to salt stress in maize.  
26 Growth inhibition of maize EMS mutants *zmnhx8* and *zmkea6* under salt stress once  
27 again validated their important functions on salt stress tolerance.

## 28 **Conclusions**

29 In the present study, we performed identification and characterization of *ZmCPA*

1 superfamily comprising *ZmNHX*, *ZmKEA* and *ZmCHX* subfamily proteins in the  
2 genome of maize. Gene and proteins structure analyses suggested conserved nature of  
3 evolutionary related molecules in each subfamily, however they significantly differed  
4 from the members of other groups. The occurrence of high composition of helices and  
5 coils in tertiary structure, and numerous TM regions supported hydrophobic  
6 membrane bound nature of these proteins. Diverse occurrence of differential  
7 expression in various tissues and under abiotic stress conditions indicated the  
8 importance of these genes in growth and development and stress management. The  
9 prediction of phosphorylation sites and *cis*-acting regulatory elements indicates that  
10 phosphorylation and transcriptional regulation may be related to the salt tolerance of  
11 *ZmCPA* genes. Characterization of *ZmNHX8*, *ZmCHX8*, -12, -14, -16 and *ZmKEA6* in  
12 yeast established their role in monovalent cation homeostasis and abiotic stress  
13 tolerance. This study verified the function of *ZmNHX8* and *ZmKEA6* by phenotypic  
14 analysis of mutants. The study provided numerous features of *ZmCPA* genes, and  
15 extended the opportunities for functional validation of each gene in future studies.  
16 Further, these genes will also be useful in future crop improvement programs for  
17 stress tolerance.

18

## 19 **Materials and methods**

### 20 **Identification and bioinformatic analysis of *ZmCPA* gene superfamily.**

21 The known *CPA* genes of *Arabidopsis* were used to query the maize AGPv4 gene set  
22 (<https://download.maizegdb.org/Zm-B73-REFERENCE-GRAMENE-4.0/>) using a  
23 local BLASTP program with an E-value <1e-10. The putatively identified sequences  
24 were further confirmed by HMMER search for the presence of signature Na<sup>+</sup>/H<sup>+</sup>  
25 exchanger (PF00999) domain.

26 The phylogenetic tree was constructed using full length CPA protein sequences of  
27 maize, *Arabidopsis*, and rice. Alignment of the sequences was done using MUSCLE  
28 v3.8.31 program [54], and a phylogenetic tree was built employing neighbor-joining  
29 (NJ) method using MEGA 6.0 [55] with the following sets, bootstrap value of 1000,

1 Poisson model for amino acid substitution model. The transmembrane domains were  
2 predicted using the TMHMM Server v. 2.0  
3 (<http://www.cbs.dtu.dk/services/TMHMM/>). The Predotar [56], TargetP [57] and  
4 WoLF PSORT (<https://www.genscript.com/wolf-psort.html>), three *in silico* programs,  
5 were used to predict the putative organellar localization of ZmCPA proteins. All the  
6 ZmCPA proteins were modeled using SWISS-MODEL  
7 (<https://swissmodel.expasy.org/>) [40] to simulate their 3D structures. Putative  
8 conserved motifs in maize CPA proteins were identified using the MEME Suite 5.1.1  
9 (<http://meme-suite.org/tools/meme>) with the following sets, motif length of 10-50 aa,  
10 maximum number of motifs to find is 15.

11

## 12 **Gene structure analysis**

13 The DNA and transcript sequences of *ZmCPA* genes obtained from the maize  
14 sequence annotation database MaizeGDB were used to design gene-specific PCR  
15 primers with Primer3 (<http://primer3.ut.ee/>). DNA and cDNA sequences were  
16 validated using PCR and RT-PCR with B73 genomic DNA and total RNA as  
17 templates and gene-specific primers shown in Table S2. Alignment of validated DNA  
18 and cDNA sequences of each maize *CPA* gene was performed to analyze the gene  
19 structure of *ZmCPA* genes. Gene structure display server (GSDS 2.0) was used to  
20 display the exon-intron structure, and intron phases [58].

21

## 22 **Plant materials and treatments**

23 The maize B73 inbred lines was used in this study. For qRT-PCR, the sterilized seeds  
24 were plant in a hydroponic equipment described previously [59] with sterile water in a  
25 greenhouse at 27/23°C with day/night of 12/12h. Four days later, the plants were  
26 incubated in 1× Hoagland solution (PhytoTech, USA) until fully trifoliolate leaves. For  
27 controls (CK), excessive potassium stress and NaCl stress, maize seedlings were  
28 planted in 1× Hoagland solution without treatment, containing 100 mM KCl and  
29 containing 100 mM NaCl, respectively. The concentrations were maintained until the



1 end of the experiments. For RT-PCR analysis, the corresponding genes were detected  
2 of CK plants to exclude the effects of plant development.

3 For maize mutants, the sterilized seeds were cultured hydroponically in a  
4 greenhouse at 27/23°C with day/night of 12/12h as above. The 1× Hoagland solution  
5 was exchanged every two days. Ten days later, 100 mM KCl and 100 mM NaCl were  
6 added. Four days after salt stress, phenotypic analysis was performed.

7

### 8 **Expression analysis of *ZmCPA* genes in different tissues.**

9 To investigate the spatiotemporal expression patterns of *ZmCPA* genes, the  
10 log<sub>2</sub>-transformed and RMA-normalized data for *ZmCPA* genes were downloaded  
11 from PLEXdb (<http://www.plexdb.org/>) [60]. A heat map was produced using  
12 Lianchuan Bio Cloud Platform (<https://www.lc-bio.cn/overview>).

13

### 14 **RNA isolation and cDNA synthesis**

15 Total RNA was isolated from different tissues of the B73 inbred lines, including  
16 seedling roots, leaves, 5-cm ears, immature tassels, anthers, pollens, silks, and seeds  
17 of 20 days after pollination, using the Trizol reagent (Invitrogen, USA) according to  
18 the manufacturer's protocol. All RNA was purified using the DNase I (Thermo  
19 Scientific, China). First-strand cDNA was synthesized from 1µg of total RNA (20 µL  
20 reaction volume) using PrimeScript™ 1st Strand cDNA Synthesis Kit (Takara, Japan)  
21 according to the manufacturer's protocol.

22

### 23 **Semi-quantitative reverse transcription PCR**

24 All gene-specific primers were designed as shown in [Table S5](#). Specific primers for  
25 the maize *Actin1* gene (*GRMZM2G126010*) were used as an internal control.  
26 Reactions were performed with 2xTaq Master Mix (Vazyme, China) on a Bio-Rad  
27 Thermal Cycler (Bio-Rad, USA) using the following procedure: 5 min at 94 °C to  
28 start; 33 cycles of 30 s at 94 °C, 30 s at 59 °C and 2 min at 72 °C; and a final  
29 extension step of 72 °C for 10 min to complete the reaction, and the *Actin1* transcript



1 was amplified with 29 PCR cycles. Each PCR pattern was performed in triplicate,  
2 mixtures without a template were employed as negative controls, and the maize  
3 *Actin1* amplicon served as an internal control for each gene investigated.

4

#### 5 **Real-time PCR**

6 Real-time PCR was performed using TB Green *Premix Ex Taq*<sup>TM</sup> II (Takara, Japan).  
7 ABI 7500 real-time PCR system (Applied Biosystems, Foster City, CA, USA) was  
8 used with the following thermal cycling conditions of 95°C for 5 min  
9 followed by 40 cycles of 95°C for 15 s, 60°C for 5 s, and 72°C for 34 s. The maize  
10 *Actin1* gene (*GRMZM2G126010*) was used as an endogenous control to normalize the  
11 samples. Based on the cDNA sequences of *ZmCPA* genes, real-time PCR primers  
12 (Table S6) were designed with primer 3 (<http://primer3.ut.ee/>). The experiment was  
13 performed with three technical replicates for each sample. The specificity of the PCR  
14 reaction was confirmed by melting curve analysis of the amplicons. Comparative 2<sup>-</sup>  
15  $\Delta\Delta CT$  method was used to calculate the relative quantities of each transcript in the  
16 samples [61].

17

#### 18 **Prediction of phosphorylation sites and cis-regulatory elements**

19 The GPS5.0 (<http://gps.biocuckoo.cn/online.php>) software was used to predict the  
20 phosphorylation site of *ZmCPA* proteins. The study selected the 2kb sequence in front  
21 of the gene coding region (ATG) as the gene's promoter region sequence. Promoter  
22 *cis*-regulatory elements were predicted using PlantCARE [62]  
23 (<http://bioinformatics.psb.ugent.be/webtools/plantcare/html/>) and displayed using  
24 DOG2.0 [63].

25

#### 26 **Subcellular localization**

27 The full-length cDNAs of *ZmCHX16* and *ZmNHX8* were amplified using the primers  
28 listed in Table S7 and then were introduced into pM999-EGFP vector to construct the

1 GFP fusion proteins, ZmCHX16-GFP and ZmNHX8-GPF with the ClonExpress II  
2 One Step Cloning Kit (Vazyme, China). Constitutive expression of the fused  
3 constructs, ZmCHX16-GFP and ZmNHX8-GPF, were driven by the cauliflower  
4 mosaic virus 35S promoter. The maize mesophyll protoplasts were isolated and  
5 prepared from etiolated leaves according to the established protocols[64]. The  
6 plasmids harboring the ZmCHX16-GFP and ZmNHX8-GPF fusion constructs each  
7 was co-transfected with the OsSCAMP1-RFP construct into the protoplast cells.  
8 OsSCAMP1 is a known rice secretory carrier membrane protein and used here as a  
9 membrane protein control [39]. The transformed protoplast cells were cultured at  
10 room temperature overnight and were observed using an Leica SP8 confocal  
11 microscope (Leica, USA).

12

### 13 **Functional expression of *ZmCPAs* in yeast**

14 The coding sequences of *ZmNHX8*, *ZmCHX8*, *ZmCHX12*, *ZmCHX14*, *ZmCHX16*,  
15 *ZmKEA6* were cloned into the PDR196 vector, and then transformed into the yeast  
16 strain AXT3K (*ena1-4::HIS3,nha1::LEU2, nhx1::KanMX*). The transformed yeast  
17 cells were cultured overnight at 29°C in YPDA medium containing 1 mM KCl. Cells  
18 were normalized in water to  $A_{600}$  of 0.8. For cation tolerance testing, 5 $\mu$ L aliquots  
19 from yeast cultures or 10-fold serial dilutions were spotted onto AP [65] plates  
20 supplemented with 1 mM KCl with or without NaCl.

21

22

23

24

25

26

27

28

29

1

2

### 3 **Acknowledgements**

4 We thank Prof. Liwen Jiang (Chinese University of Hong Kong) for kindly providing  
5 pM999-EGFP and membrane protein marker (OsSCAMP1-RFP) plasmids, Prof.  
6 Xiaoduo Lu (Qilu Normal University) for identifying and providing maize EMS  
7 mutants *zmkea6* and *zmnhx8*, and Profs. Yi Wang and Zhenxian Zhang (China  
8 Agricultural University) for kindly sharing yeast mutant AXT3K and yeast expression  
9 vector pDR196.

10

### 11 **Authors' contributions**

12 YST, YXZ(Yanxin Zhao) and JRZ conceived the experiment. MSK, YXZ(Yunxia  
13 Zhang), ZF, WS, JNL, RYZ, RHW and YDW performed bioinformatic analysis and  
14 data acquisition. MSK, MJL, and YXZ(Yanxin Zhao) analyzed the data and wrote the  
15 manuscript. All authors revised and approved the final manuscript, and agreed to be  
16 accountable for this work.

17

### 18 **Funding**

19 This research was financially supported by the Beijing Municipal Natural Science  
20 Foundation (6204041), the Construction of Collaborative Innovation Center of  
21 Beijing Academy of Agricultural and Forestry Sciences (Collaborative Innovation  
22 Center of Crop Phenomics, KJCX201917) and the Beijing Scholars Program  
23 (BSP041). The funding body does not play roles in the design of the study and  
24 collection, analysis, and interpretation of data and in writing the manuscript.

25

### 26 **Availability of data and materials**

27 The datasets and materials used and/or analyzed during the current study are available  
28 from the corresponding author on reasonable request.

29

1 **Ethics declarations**

2 **Ethics approval and consent to participate**

3 Not applicable.

4

5 **Consent for publication**

6 All authors read and approved the final manuscript.

7

8 **Competing interests**

9 The authors declare that they have no competing interests.

10

11 **References**

- 12 1. Zhu JK. Plant salt tolerance. *Trends Plant Sci.* 2001;6:66–71.
- 13 2. Gupta B, Huang B. Mechanism of salinity tolerance in plants: physiological, biochemical,  
14 and molecular characterization. *Int J Genom.* 2014;1:701596.
- 15 3. Munns R, Tester M. Mechanisms of salinity tolerance. *Annu Rev Plant Biol.*  
16 2008;59:651–681.
- 17 4. Teakle NL, Tyerman SD. Mechanisms of Cl<sup>-</sup> transport contributing to salt tolerance. *Plant*  
18 *Cell Environ.* 2010;33:566–589.
- 19 5. Pardo JM, Cubero B, Leidi EO, Quintero FJ. Alkali cation exchangers: roles in cellular  
20 homeostasis and stress tolerance. *J Exp Bot.* 2006;57:1181–1199.
- 21 6. Ward JM, Mäser P, Schroeder JI. Plant ion channels: gene families, physiology, and  
22 functional genomics analyses. *Annu Rev Physiol.* 2009;71(1):59–82.
- 23 7. Barbier-Brygoo H, De Angeli A, Filleur S, Frachisse JM, Gambale F, Thomine S, Wege S.  
24 Anion channels/transporters in plants: from molecular bases to regulatory networks. *Annu*  
25 *Rev Plant Biol.* 2011;62(62):25–51.
- 26 8. Yamaguchi T, Hamamoto S, Uozumi N. Sodium transport system in plant cells. *Front Plant*  
27 *Sci.* 2013;4:410.
- 28 9. Hamamoto S, Horie T, Hauser F, Deinlein U, Schroeder JI, Uozumi N. HKT transporters  
29 mediate salt stress resistance in plants: from structure and function to the field. *Curr Opin*  
30 *Biotechnol.* 2015;32:113–120.
- 31 10. Pires IS, Negrão S, Pentony MM, Abreu IA, Oliveira MM, Purugganan MD. Different  
32 evolutionary histories of two cation/proton exchanger gene families in plants. *BMC Plant*  
33 *Biol.* 2013;13(1): 97.
- 34 11. Saier MH, Reddy VS, Tamang DG, Västermark A. The transporter classification database.  
35 *Nucleic Acids Res.* 2014;42(D1):D251–D258.
- 36 12. Chanroj S, Wang G, Venema K, Zhang MW, Delwiche CF, Sze H. Conserved and diversified  
37 gene families of monovalent Cation/H<sup>+</sup> Antiporters from algae to flowering plants. *Front*  
38 *Plant Sci.* 2012;3:25.

- 1 13. Ye CY, Yang X, Xia X, Yin W. Comparative analysis of cation/proton antiporter superfamily  
2 in plants. *Gene*. 2013;521(2):245–251.
- 3 14. Yokoi S, Quintero FJ, Cubero B, Ruiz MT, Bressan RA, Hasegawa PM, Pardo JM.  
4 Differential expression and function of *Arabidopsis thaliana* NHX Na<sup>+</sup>/H<sup>+</sup> antiporters in the  
5 salt stress response. *Plant J*. 2002;30(5):529–539.
- 6 15. Elias B, Aadian C, Eduardo B. Cellular ion homeostasis: emerging roles of intracellular NHX  
7 Na<sup>+</sup>/H<sup>+</sup> antiporters in plant growth and development. *J Exp Bot*. 2012;63(16):5727–5740.
- 8 16. Yamaguchi T, Apse MP, Shi H, Blumwald E. Topological analysis of a plant vacuolar Na<sup>+</sup>/H<sup>+</sup>  
9 antiporter reveals a luminal C terminus that regulates antiporter cation selectivity. *Proc Natl*  
10 *Acad Sci USA*. 2003;100(21):12510–12515.
- 11 17. Apse MP, Aharon GS, Snedden WA, Blumwald E. Salt tolerance conferred by overexpression  
12 of a vacuolar Na<sup>+</sup>/H<sup>+</sup> antiport in *Arabidopsis*. *Science*. 1999;285(5231):1256–1258.
- 13 18. Apse MP, Sottosanto JB, Blumwald E. Vacuolar cation/H<sup>+</sup> exchange, ion homeostasis, and  
14 leaf development are altered in a T-DNA insertional mutant of *AtNHX1*, the *Arabidopsis*  
15 vacuolar Na<sup>+</sup>/H<sup>+</sup> antiporter. *Plant J*. 2003;36:229–239.
- 16 19. Barragán V, Leidi EO, Andrés Z, Rubio L, De Luca A, Fernández JA, Cubero B, Pardo JM.  
17 Ion exchangers NHX1 and NHX2 mediate active potassium uptake into vacuoles to regulate  
18 cell turgor and stomatal function in *Arabidopsis*. *Plant Cell*. 2012;24(3):1127–1142.
- 19 20. Bassil E, Ohto M, Esumi T, Tajima H, Zhu Z, Cagnac O, Belmonte M, Peleg Z, Yamaguchi T,  
20 Blumwald E. The *Arabidopsis* intracellular Na<sup>+</sup>/H<sup>+</sup> antiporters NHX5 and NHX6 are  
21 endosome associated and necessary for plant growth and development. *Plant Cell*.  
22 2011;23(1):224–239.
- 23 21. Jiang J, Shi H. Signaling control of *SOS1* mRNA stability. *Plant Signal Behav*.  
24 2008;3(9):687–688.
- 25 22. Feki K, Tounsi S, Masmoudi K, Brini F. The durum wheat plasma membrane Na<sup>+</sup>/H<sup>+</sup>  
26 antiporter SOS1 is involved in oxidative stress response. *Protoplasma*. 2016;254(4):1–10.
- 27 23. Nie W, Xu L, Yu B. A putative soybean *GmsSOS1* confers enhanced salt tolerance to  
28 transgenic *Arabidopsis sos1-1* mutant. *Protoplasma*. 2015;252(1):127–134.
- 29 24. An R, Chen Q J, Chai M F, Lu P L, Su Z, Qin Z X, Chen J, Wang XC. *AtNHX8*, a member of  
30 the monovalent cation: proton antiporter-1 family in *Arabidopsis thaliana*, encodes a putative  
31 Li<sup>+</sup>/H<sup>+</sup> antiporter, *Plant J*. 2007;49(4):718–728.
- 32 25. Mäser P, Thomine S, Schroeder JI, Ward JM, Hirschi K, Sze H, Talke IN, Amtmann A,  
33 Maathuis FJM, Sanders D, Harper JF, Tchieu J, Gribskov M, Persans MW, Salt DE, Kim SA,  
34 Guerinot ML. Phylogenetic relationships within cation transporter families of *Arabidopsis*.  
35 *Plant Physiol*. 2001;126(4):1646–1667.
- 36 26. Aranda-Sicilia MN, Cagnac O, Chanroj S, Sze H, Rodríguez-Rosales MP, Venema K.  
37 *Arabidopsis* KEA2, a homolog of bacterial KefC, encodes a K<sup>+</sup>/H<sup>+</sup> antiporter with a  
38 chloroplast transit peptide. *Biochim Biophys Acta*. 2012;1818(9): 2362–2371.
- 39 27. Zheng S, Pan T, Fan L, Qiu Q. A novel *AtKEA* gene family, homolog of bacterial K<sup>+</sup>/H<sup>+</sup>  
40 antiporters, plays potential roles in K<sup>+</sup> homeostasis and osmotic adjustment in *Arabidopsis*.  
41 *PLoS One*. 2013;8(11):e81463.
- 42 28. Kunz HH, Gierth M, Herdean A, Satoh-Cruz M, Kramer DM, Spetea C, Schroeder JI.  
43 Plastidial transporters KEA1, -2, and -3 are essential for chloroplast osmoregulation, integrity,  
44 and pH regulation in *Arabidopsis*. *Proc Natl Acad Sci USA*. 2014;111(20):7480–7485.

- 1 29. Aranda-Sicilia MN, Aboukila A, Armbruster U, Cagnac O, Schumann T, Kunz HH, Jahns P,  
2 Rodríguez-Rosales MP, Sze H, Venema K. Envelope  $K^+/H^+$  antiporters AtKEA1 and AtKEA2  
3 function in plastid development. *Plant Physiol.* 2016;172(1):441–449.
- 4 30. Chanroj S, Lu Y, Padmanaban S, Nanatani K, Uozumi N, Rao R, Sze H. Plant-specific  
5 cation/ $H^+$  exchanger 17 and its homologs are endomembrane  $K^+$  transporters with roles in  
6 protein sorting. *J Biol Chem.* 2011;286(39):33931–33941.
- 7 31. Lu Y, Chanroj S, Zulkifli L, Johnson MA, Uozumi N, Chenung A, Sze H. Pollen tubes  
8 lacking a pair of  $K^+$  transporters fail to target ovules in *Arabidopsis*. *Plant Cell.*  
9 2011;23(1):81–93.
- 10 32. Sze H, Padmanaban S, Cellier F, Honys D, Cheng NH, Bock KW, Conéjéro G, Li X, Twell D,  
11 Ward JM, Hirschi KD. Expression patterns of a novel *AtCHX* gene family highlight potential  
12 roles in osmotic adjustment and  $K^+$  homeostasis in pollen development, *Plant Physiol.*  
13 2004;136(1):2532–2547.
- 14 33. Zhao J, Li P, Motes CM, Park S, Hirschi KD, CHX14 is a plasma membrane  $K^+$ -efflux  
15 transporter that regulates  $K^+$  redistribution in *Arabidopsis thaliana*. *Plant Cell Environ.*  
16 2015;38(11):2223–2238.
- 17 34. Hall D, Evans AR, Newbury HJ, Pritchard J. Functional analysis of CHX21: a putative  
18 sodium transporter in *Arabidopsis*. *J Exp Bot.* 2006;57(5):1201–1210.
- 19 35. Song CP, Guo Y, Qiu Q, Lambert G, Galbraith DW, Jagendorf A, Zhu JK. A probable  $Na^+$   
20 ( $K^+$ )/ $H^+$  exchanger on the chloroplast envelope functions in pH homeostasis and chloroplast  
21 development in *Arabidopsis thaliana*. *Proc Natl Acad Sci USA.* 2004;101(27):10211–10216.
- 22 36. Hur Y, Kim JH, Lee DJ, Chung KM, Woo HR. Overexpression of *AtCHX24*, a member of the  
23 cation/ $H^+$  exchangers, accelerates leaf senescence in *Arabidopsis thaliana*. *Plant Sci.*  
24 2012;183:175–182.
- 25 37. Chen Y, Ma J, Miller AJ, Luo B, Wang M, Zhu Z, Ouwerkerk PBF. OsCHX14 is involved in  
26 the  $K^+$  homeostasis in rice (*Oryza sativa*) flowers. *Plant Cell Physiol.*  
27 2016;57(7):1530–1543.
- 28 38. Zhou H, Qi K, Liu X, Yin H, Wang P, Chen J, Wu J, Zhang S. Genome-wide identification  
29 and comparative analysis of the cation proton antiporters family in pear and four other  
30 Rosaceae species. *Mol Genet Genomics.* 2016;291(4):1727–1742.
- 31 39. Lam SK, Siu CL, Hillmer S, Jang S, An G, Robinson DG, Jiang L. Rice SCAMP1 defines  
32 clathrin-coated, *trans*-golgi-located tubular-vesicular structures as an early endosome in  
33 tobacco BY-2 cells. *Plant Cell.* 2007;19(1):296–319.
- 34 40. Waterhouse A, Bertoni M, Bienert S, Studer G, Tauriello G, Gumienny R, Heer FT, de Beer  
35 TAP, Rempfer C, Bordoli L, Lepore R, Schwede T. SWISS-MODEL: homology modelling of  
36 protein structures and complexes. *Nucleic Acids Res.* 2018;46(W1):W296–W303.
- 37 41. Sharma H, Taneja M, Upadhyay SK. Identification, characterization and expression profiling  
38 of cation-proton antiporter superfamily in *Triticum aestivum* L. and functional analysis of  
39 *TaNHX4-B*. *Genomics.* 2020;112(1):356–370.
- 40 42. Sekhon RS, Lin H, Childs KL, Hansey CN, Buell CR, de Leon N, Kaeppler SM.  
41 Genome-wide atlas of transcription during maize development. *Plant J.* 2011;66(4):553–563.
- 42 43. Quintero FJ, Blatt MR, Pardo JM. Functional conservation between yeast and plant  
43 endosomal  $Na^+/H^+$  antiporters. *FEBS Lett.* 2000;471(2-3):224–228.
- 44 44. Lu X, Liu J, Ren W, Yang Q, Chai Z, Chen R, Wang L, Zhao J, Lang Z, Wang H, Fan Y, Zhao

- 1 J, Zhang C. Gene-indexed mutations in maize. *Mol Plant*. 2018;11(3):496–504.
- 2 45. Evans AR, Hall D, Pritchard J, Newbury HJ. The roles of the cation transporters CHX21 and
- 3 CHX23 in the development of *Arabidopsis thaliana*. *J Exp Bot*. 2012;63(1):59–67.
- 4 46. Zhang WW, Meng JJ, Xing JY, Yang S, Guo F, Li XG, Wan SB. The  $K^+/H^+$  antiporter
- 5 *AhNHX1* improved tobacco tolerance to NaCl stress by enhancing  $K^+$  retention. *J Plant Biol*.
- 6 2017;60(3):259–267.
- 7 47. Jia Q, Zheng C, Sun S, Amjad H, Liang K, Lin W. The role of plant cation/proton antiporter
- 8 gene family in salt tolerance. *Biol Plantarum*. 2018;62(4):617–629.
- 9 48. Zörb C, Noll A, Karl S, Leib K, Yan F, Schubert S. Molecular characterization of  $Na^+/H^+$
- 10 antiporters (ZmNHX) of maize (*Zea mays* L.) and their expression under salt stress. *J Plant*
- 11 *Physiol*. 2005;162(1):55–66.
- 12 49. Pitann B, Mohamed AK, Neubert AB, Schubert S. Tonoplast  $Na^+/H^+$  antiporters of newly
- 13 developed maize (*Zea mays*) hybrids contribute to salt resistance during the second phase of
- 14 salt stress. *J Plant Nutr Soil Sci*. 2013;176(2):148–156.
- 15 50. Zhao J, Cheng NH, Motes CM, Blancaflor EB, Moore M, Gonzales N, Padmanaban S, Sze H,
- 16 Ward JM, Hirschi KD. AtCHX13 is a plasma membrane  $K^+$  transporter. *Plant Physiol*.
- 17 2008;148(2):796–807.
- 18 51. Shi H, Quintero FJ, Pardo JM, Zhu JK. The putative plasma membrane  $Na^+/H^+$  antiporter
- 19 SOS1 controls long-distance  $Na^+$  transport in plants. *Plant Cell*. 2002;14(2):465–477.
- 20 52. Luo M, Zhang Y, Chen K, Kong M, Song W, Lu B, Shi Y, Zhao Y, Zhao J. Mapping of
- 21 quantitative trait loci for seedling salt tolerance in maize. *Mol Breeding*. 2019;39:64.
- 22 53. Luo M, Zhao Y, Zhang R, Xing J, Duan M, Li J, Wang N, Wang W, Zhang S, Chen Z, Zhang
- 23 H, Shi Z, Song W, Zhao J. Mapping of a major QTL for salt tolerance of mature field-grown
- 24 maize plants based on SNP markers. *BMC Plant Biol*. 2017;17(1):140.
- 25 54. Edgar RC. MUSCLE: a multiple sequence alignment method with reduced time and space
- 26 complexity. *BMC Bioinformatics*. 2004;5:113.
- 27 55. Tamura K, Stecher G, Peterson D, Filipinski A, Kumar S. MEGA6: molecular evolutionary
- 28 genetics analysis version 6.0. *Mol Biol Evol*. 2013;30(12):2725–2729
- 29 56. Small I, Peeters N, Legeai F, Lurin C. Predotar: A tool for rapidly screening proteomes for
- 30 N-terminal targeting sequences. *Proteomics*. 2004;4(6):1581–1590.
- 31 57. Emanuelsson O, Brunak S, von Heijne G, Nielsen H. Locating proteins in the cell using
- 32 TargetP, SignalP and related tools. *Nat Protoc*. 2007;2(4):953–971.
- 33 58. Hu B, Jin J, Guo AY, Zhang H, Luo J, Gao G. GSDS 2.0: an upgraded gene feature
- 34 visualization server. *Bioinformatic*. 2015;31:1296–1297.
- 35 59. Luo M, Zhao Y, Wang Y, Shi Z, Zhang P, Zhang Y, Song W, Zhao J. Comparative proteomics
- 36 of contrasting maize genotypes provides insights into salt-stress tolerance mechanisms. *J*
- 37 *Proteome Res*. 2018;17(1):141–153.
- 38 60. Dash S, Van Hemert J, Hong L, Wise RP, Dickerson JA. PLEXdb: gene expression resources
- 39 for plants and plant pathogens. *Nucleic Acids Res*. 2010; 40(Database issue):D1194–1201.
- 40 61. Thomas S, Kenneth D, Livak J. Analyzing real-time PCR data by comparative CT method.
- 41 *Nat Protoc*. 2008;3(6):1101–1108.
- 42 62. Lescot M. PlantCARE, a database of plant cis-acting regulatory elements and a portal to tools
- 43 for in silico analysis of promoter sequences. *Nucleic Acids Res*. 2002;30(1):325–327.
- 44 63. Ren J, Wen L, Gao X, Jin C, Xue Y, Yao X. DOG 1.0: illustrator of protein domain structures.



- 1 Cell Res. 2009;19(2):271–273.  
2 64. Yoo SD, Cho YH, Sheen J. *Arabidopsis* mesophyll protoplasts: a versatile cell system for  
3 transient gene expression analysis. Nat Protoc.2007;2(7):1565-1572.  
4 65. Rodríguez-Navarro A, Ramos J. Dual system for potassium transport in *Saccharomyces*  
5 *cerevisiae*. J Bacteriol. 1984;159(3):940–945.  
6

## 7 **Figure Legends**

### 8 **Figure 1. Gene structures of *ZmCPA* genes.**

9 The schematic diagram of the NJ tree of maize CPA genes at left was drawn based on Fig. 3. The  
10 exon-intron organization of *ZmCPA* genes (right) was analyzed by aligning the DNA and cDNA  
11 sequences of one *CPA* gene within GSDS 2.0 server (<http://gsds.gao-lab.org/index.php>). Introns  
12 and exons are shown as thin lines and yellow boxes, respectively. Numbers 0, 1 and 2 represent  
13 the different intron phases. Blue boxes at 5' and 3' ends represent untranslated regions (UTRs).  
14

### 15 **Figure 2. Phylogenetic tree of the *CPA* genes of maize, *Arabidopsis* and rice.**

16 The NJ tree was constructed using MEGA 6.0 based on alignment of a total of 103 CPA proteins  
17 including 35 *ZmCPAs*, 42 *AtCPAs* and 26 *OsCPAs*. NHX, KEA and CHX subfamilies are divided  
18 into three (N1, N2 and N3), three (C1, C2, C3 and C4) and two (K1 and K2) groups, respectively.  
19

### 20 **Figure 3. Phylogenetic tree of *ZmCPA* genes.**

21 All of 35 *ZmCPA* proteins were aligned by the MUSCLE v3.8.31 program [54] and the alignment  
22 was used to construct the NJ tree with MEGA 6.0 [55]. *ZmCPA* genes are divided into three  
23 subfamilies, *ZmNHXs*, *ZmKEAs* and *ZmCHXs*.  
24

### 25 **Figure 4. Subcellular localization of *ZmCHX16* and *ZmNHX8* proteins.**

26 The *ZmCHX16*-GFP (the upper panel) and *ZmNHX8*-GFP (the lower panel) fusion proteins were  
27 transiently expressed in maize protoplast cells co-transformed with the *OsSCAMP1*-RFP fusion  
28 construct as a membrane protein marker. The GFP and RFP signals were detected by Leica SP8  
29 confocal fluorescent microscopy. Scale bar = 5µm.  
30

### 31 **Figure 5. Gene expression profile of *ZmCPA* genes in different tissues.**

32 The normalized microarray expression data of *ZmCPA* genes was download from PLEXdb  
33 (<http://www.plexdb.org/>). Cluster analysis and the heatmap production was performed using  
34 Lianchuan BioCloud Platform (<https://www.lc-bio.cn/overview>).  
35

### 36 **Figure 6. Expression analysis of *ZmCPA* genes in the eight different tissues of B73 37 inbred line by semiq-RT-PCR.**

38 The total RNA of eight tissues including seedling roots, seedling leaves, 5-cm immature ears,  
39 tassels, anthers, pollen, silk and whole seeds (20 days after pollination, DAP), were isolated and  
40 used to perform the semiq-RT-PCR of *ZmCPA* genes with the primers shown in Table S. The  
41 maize *Actin1* gene was an internal control.



1  
2  
3  
4  
5  
6  
7  
8  
9  
10  
11  
12  
13  
14  
15  
16  
17  
18  
19  
20  
21  
22  
23  
24  
25  
26  
27  
28  
29  
30  
31  
32  
33  
34  
35  
36  
37

**Figure 7. Expression analysis of *ZmCPA* genes under salt stress conditions by qRT-PCR.**

Expression analysis of *ZmCPA* genes under 100 mM NaCl or 100 mM KCl was carried out by quantitative reverse transcription-polymerase chain reaction (qRT-PCR). The y-axis represents the relative expression levels of *ZmCPA* genes compared with that of *actin1*. The x-axis represents different time points after salt treatment in each group. Error bars represent standard deviations for three replicates. qRT-PCR data were analyzed using the  $2^{-\Delta\Delta Ct}$  method as described previously [65].

**Figure 8. *ZmCPA* genes facilitate growth of yeast mutant strain AXT3K under salt stress.**

The full length CDS sequences of *ZmNHX8*, *ZmCHX8*, *ZmCHX12*, *ZmCHX14*, *ZmCHX16*, *ZmKEA6* were cloned into the PDR196 vector, and then transformed into the yeast strain AXT3K (*ena1-4::HIS3, nha1::LEU2, nhx1::KanMX*). The yeast transformant cells cultured overnight were normalized in water to  $A_{600}$  of 0.8. Aliquos (5  $\mu$ L) of 10-fold serial dilutions were spotted on AP plates supplemented with 20 mM NaCl at pH 7.5 (right panel) and normal AP plates as a control (left panel). The strains were grown at 29°C for 5 days and were photographed.

**Figure 9. Growth performance of *zmnhx8* and *zmkea6* mutant seedlings under salt stress.**

The point mutation sites of the EMS mutants *zmnhx8* and *zmkea6* were identified by PCR sequencing with the primers shown in Table S7. (a) The stop codons induced by EMS resulted in truncated proteins. Growth status (b), seedling length and dry weight (c) of the mutant seedlings under 100 mM NaCl treatment for 4 days were measured (n = 6, means  $\pm$  SEM). Significant difference was calculated using Student's t-test. \* indicants p-value < 0.05.

1

2

3

4 **Table 1. Information of maize CPA genes identified in this study.**

| Gene Name      | Gene Model            | Chromosomal Location       | CDS (bp) | Protein Length (aa) |
|----------------|-----------------------|----------------------------|----------|---------------------|
| <i>ZmNHX1</i>  | <i>Zm00001d028330</i> | Chr1: 31041489-31049951    | 1599     | 532                 |
| <i>ZmNHX2</i>  | <i>Zm00001d031232</i> | Chr1: 182925112-182945175  | 3411     | 1136                |
| <i>ZmNHX3</i>  | <i>Zm00001d003728</i> | Chr2: 56632216-56643296    | 2367     | 788                 |
| <i>ZmNHX4</i>  | <i>Zm00001d048732</i> | Chr4: 4469601-4475393      | 1641     | 546                 |
| <i>ZmNHX5</i>  | <i>Zm00001d019978</i> | Chr7: 81486383-81509317    | 1611     | 536                 |
| <i>ZmNHX6</i>  | <i>Zm00001d020892</i> | Chr7: 135679272-135687679  | 1491     | 496                 |
| <i>ZmNHX7</i>  | <i>Zm00001d021844</i> | Chr7: 164344371-164361391  | 2820     | 939                 |
| <i>ZmNHX8</i>  | <i>Zm00001d022504</i> | Chr7: 179047417-179052457  | 1620     | 539                 |
| <i>ZmNHX9</i>  | <i>Zm00001d045883</i> | Chr9: 45473833-45477106    | 1638     | 545                 |
| <i>ZmNHX10</i> | <i>Zm00001d048459</i> | Chr9: 156705048-156709982  | 1440     | 479                 |
| <i>ZmNHX11</i> | <i>Zm00001d024832</i> | Chr10: 90134129-90141743   | 1680     | 559                 |
| <i>ZmNHX12</i> | <i>Zm00001d025052</i> | Chr10: 101802712-101807654 | 1563     | 520                 |
| <i>ZmNHX13</i> | <i>Zm00001d026118</i> | Chr10: 138832710-138862665 | 2115     | 704                 |
| <i>ZmCHX1</i>  | <i>Zm00001d031077</i> | Chr1: 176192733-176196049  | 2388     | 795                 |
| <i>ZmCHX2</i>  | <i>Zm00001d031078</i> | Chr1: 176200721-176205899  | 2061     | 686                 |
| <i>ZmCHX3</i>  | <i>Zm00001d005032</i> | Chr2: 155039785-155042337  | 2553     | 850                 |
| <i>ZmCHX4</i>  | <i>Zm00001d041198</i> | Chr3: 105028259-105030854  | 2529     | 842                 |
| <i>ZmCHX5</i>  | <i>Zm00001d044623</i> | Chr3: 233503244-233505658  | 2415     | 804                 |
| <i>ZmCHX6</i>  | <i>Zm00001d049663</i> | Chr4: 39074035-39076527    | 2493     | 830                 |
| <i>ZmCHX7</i>  | <i>Zm00001d050509</i> | Chr4: 94925858-94928987    | 2232     | 743                 |
| <i>ZmCHX8</i>  | <i>Zm00001d053237</i> | Chr4: 221575337-221578465  | 2478     | 825                 |
| <i>ZmCHX9</i>  | <i>Zm00001d017805</i> | Chr5: 207302222-207308368  | 2484     | 827                 |
| <i>ZmCHX10</i> | <i>Zm00001d035631</i> | Chr6: 37793506-37814621    | 2571     | 856                 |
| <i>ZmCHX11</i> | <i>Zm00001d038517</i> | Chr6: 159098609-159101687  | 2598     | 865                 |
| <i>ZmCHX12</i> | <i>Zm00001d021461</i> | Chr7: 152741608-152744549  | 2424     | 807                 |
| <i>ZmCHX13</i> | <i>Zm00001d009889</i> | Chr8: 87464523-87467367    | 2391     | 796                 |
| <i>ZmCHX14</i> | <i>Zm00001d010601</i> | Chr8: 121526743-121529490  | 2475     | 824                 |
| <i>ZmCHX15</i> | <i>Zm00001d010629</i> | Chr8: 122278283-122281316  | 2874     | 957                 |
| <i>ZmCHX16</i> | <i>Zm00001d012521</i> | Chr8: 176021482-176024817  | 2628     | 875                 |
| <i>ZmKEA1</i>  | <i>Zm00001d027466</i> | Chr1: 5893819-5906194      | 1791     | 596                 |
| <i>ZmKEA2</i>  | <i>Zm00001d001788</i> | Chr2: 935639-948444        | 3480     | 1159                |
| <i>ZmKEA3</i>  | <i>Zm00001d041308</i> | Chr3: 111434917-111440097  | 2397     | 798                 |
| <i>ZmKEA4</i>  | <i>Zm00001d036981</i> | Chr6: 108202268-108211871  | 1848     | 615                 |
| <i>ZmKEA5</i>  | <i>Zm00001d046231</i> | Chr9: 73621310-73635421    | 1872     | 623                 |
| <i>ZmKEA6</i>  | <i>Zm00001d026645</i> | Chr10: 149326566-149340249 | 3315     | 1104                |

5

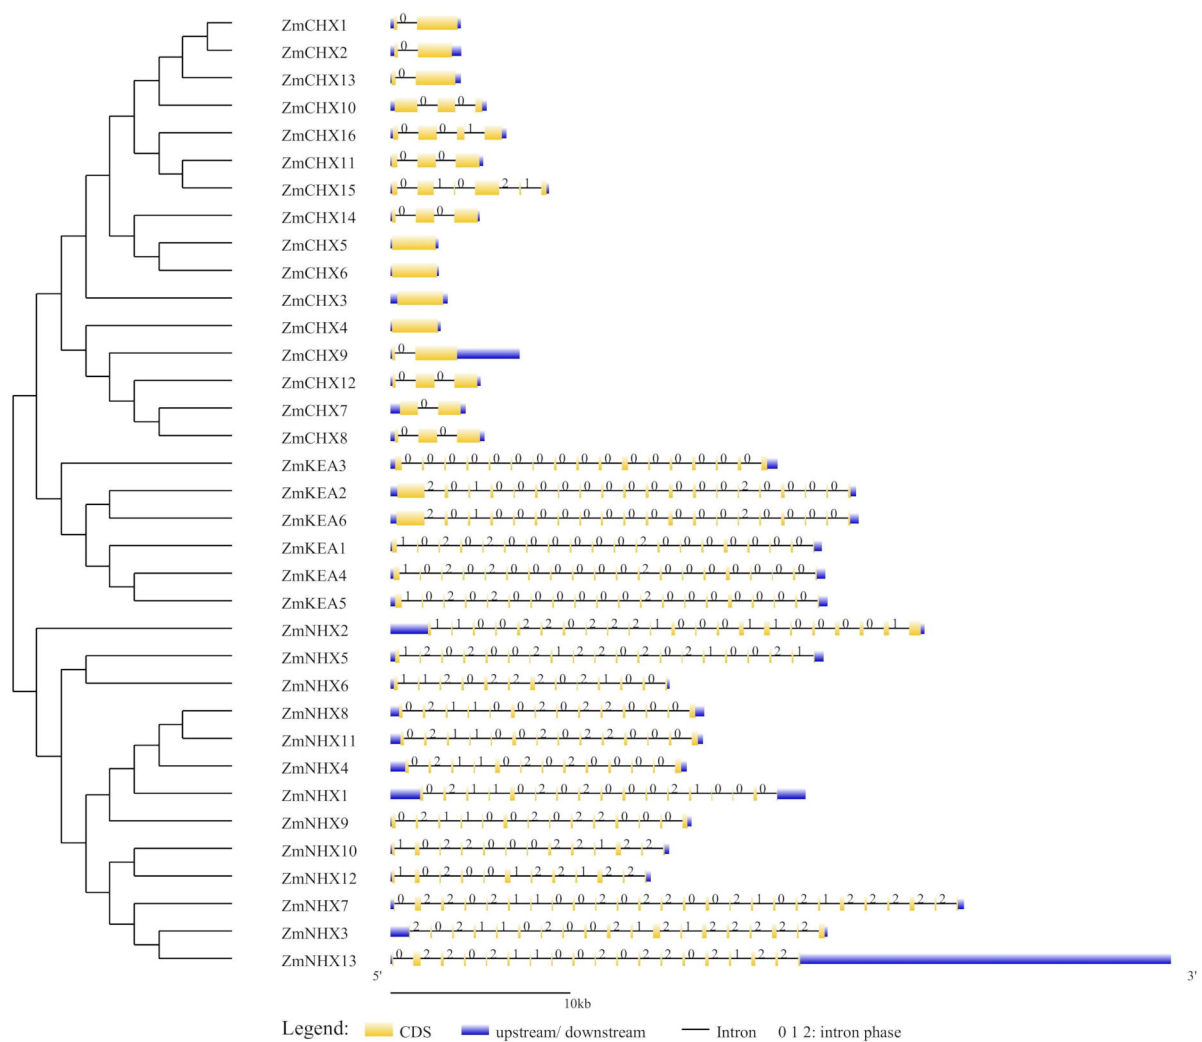



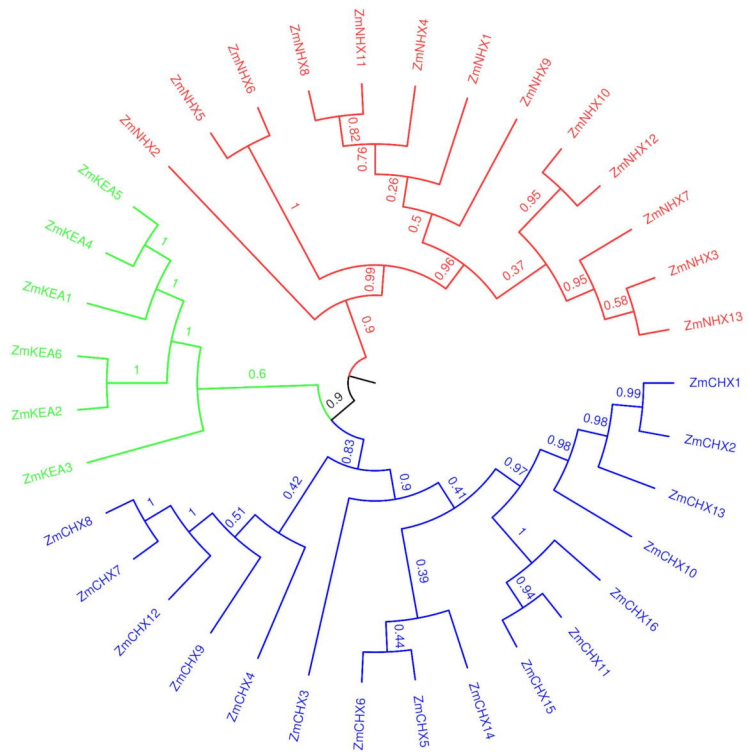

GFP

RFP

Merged

Bright

ZmCHX16

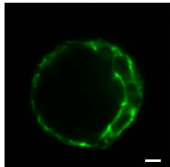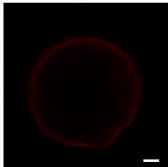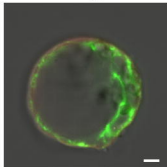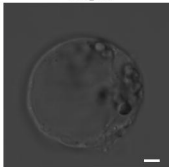

ZmNHX8

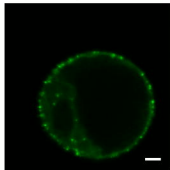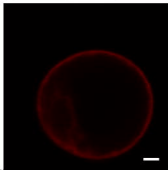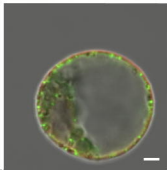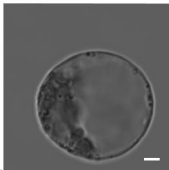

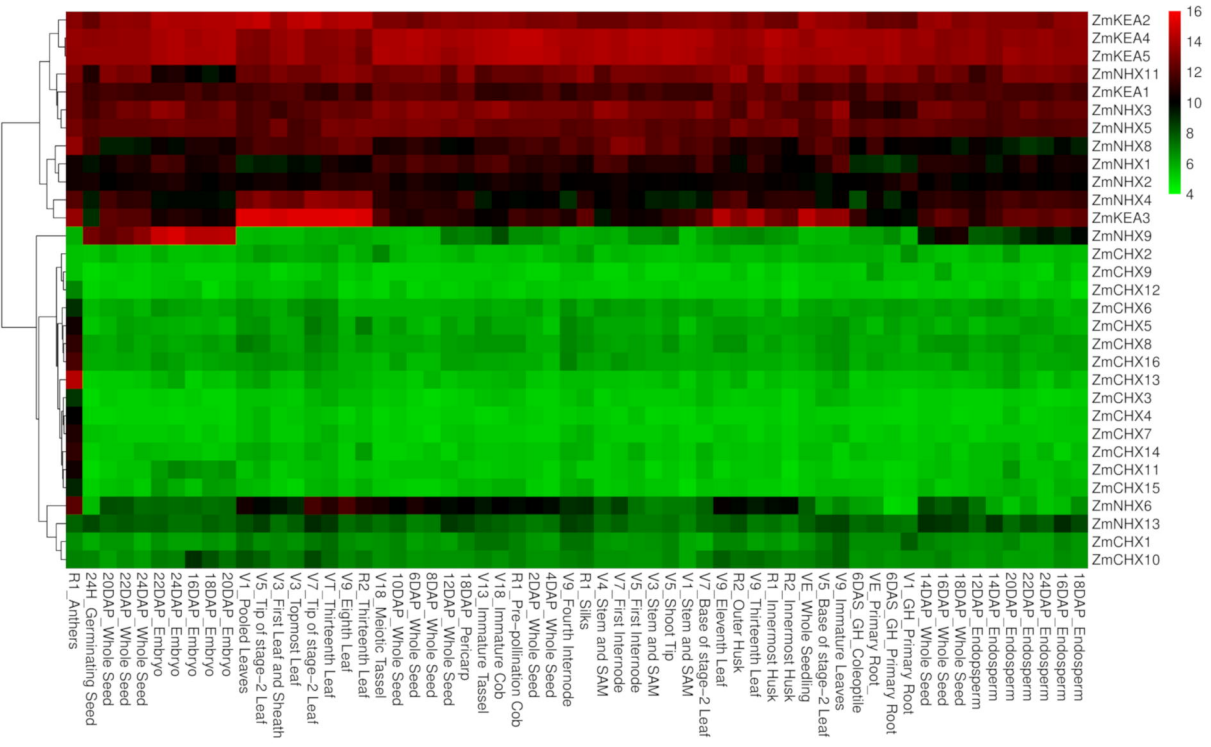





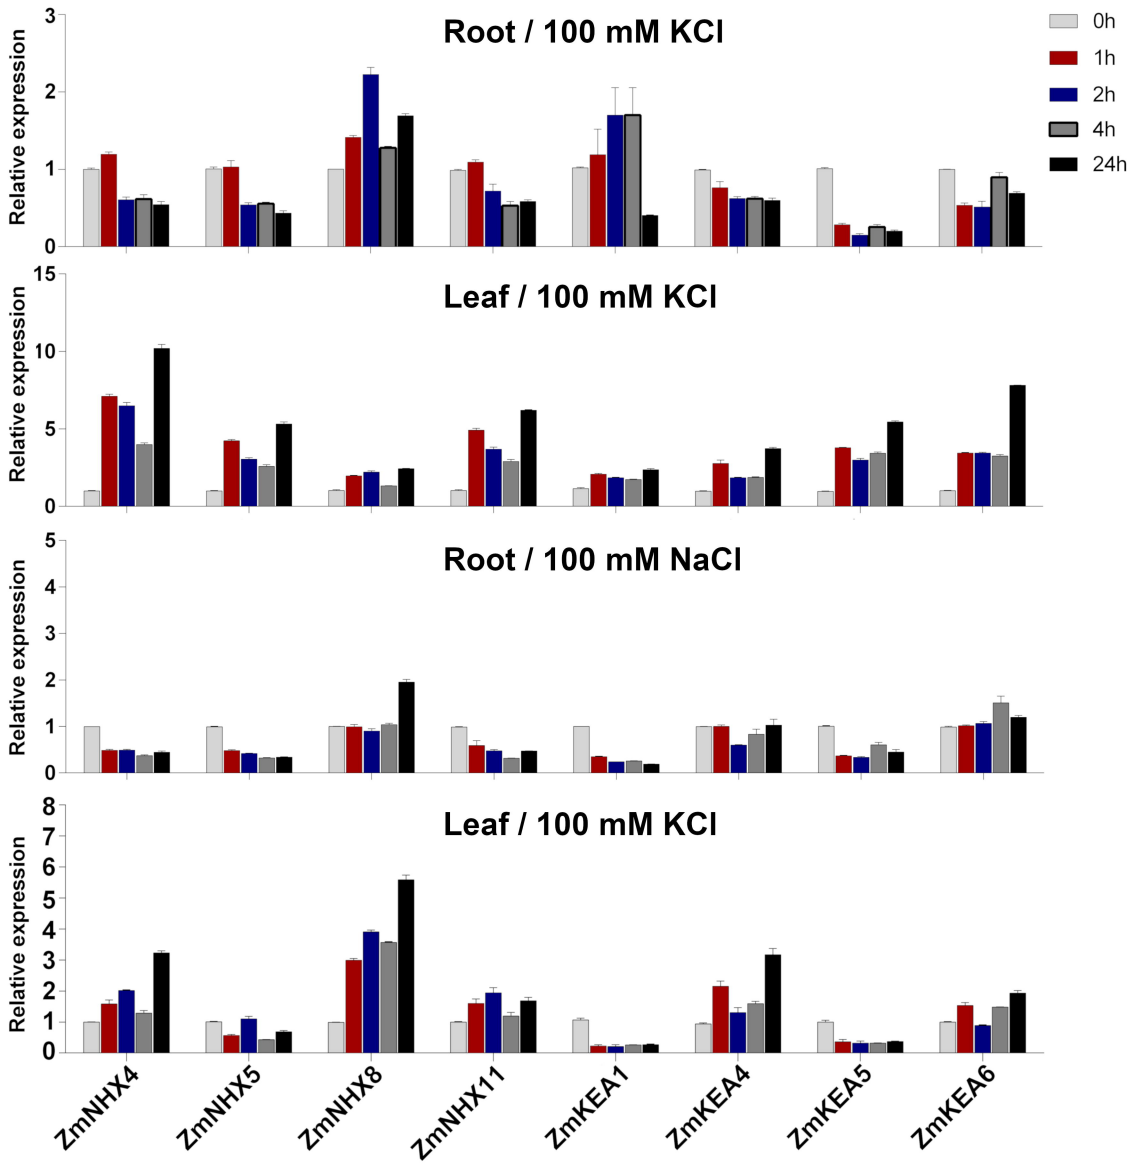

**AP****AP+20mM NaCl**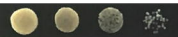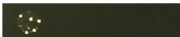**AXT3K**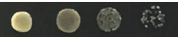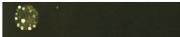**PDR196**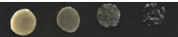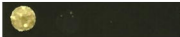**ZmNHX8**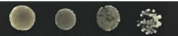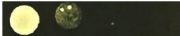**ZmCHX8**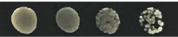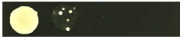**ZmCHX12**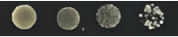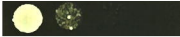**ZmCHX14**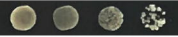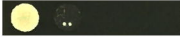**ZmCHX16**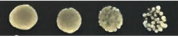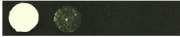**ZmKEA6**

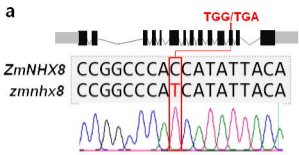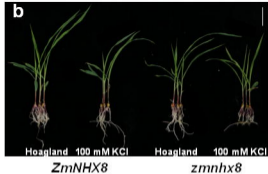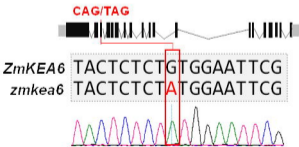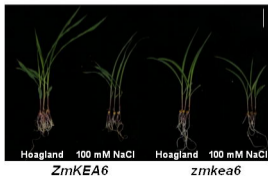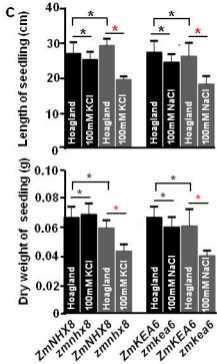

Source: https://www.biorxiv.org/content/10.1101/2020.04.15.042580v1.full.pdf
